# Supplementary material for: De Novo designed 13 mer hairpin-peptide arrests insulin and inhibits its aggregation: role of OH–π interactions between water and hydrophobic amino acids
Source: Royal Society of Chemistry journal article supplement (doi:10.1039/d0ra00832j), 2020-01-01
Supplement: d0ra00832j1.pdf [file d0ra00832j1.pdf]

# De-Novo designed 13 mer hairpin-peptide arrests Insulin and inhibits its aggregation: Role of OH- $\pi$ interactions between water and hydrophobic amino acids.

Meghomukta Mukherjee<sup>a</sup>, Nilanjan Banerjee<sup>a</sup> and Subhrangsu Chatterjee\*<sup>a</sup>.

[a] M. Mukherjee, N. Banerjee, Dr. S. Chatterjee

Department of Biophysics, Bose Institute, P 1/12 CIT, Scheme VII M, Kankurgachi, Kolkata 700054 (India)

E-mail: subhro\_c@jcbose.ac.in

## SUPPORTING MATERIAL

**Table S1.a** calculation of secondary structure percentage from K2D software of initial stage/0min.

| SAMPLES                    | % of $\alpha$ -HELIX | % of $\beta$ -STRAND | RANDOM COIL |
|----------------------------|----------------------|----------------------|-------------|
| <b>Insulin 0min</b>        | 66                   | 18                   | 21          |
| <b>Insulin-B2T_YY 0min</b> | 52                   | 16                   | 22          |
| <b>Insulin-B2T_TT 0min</b> | 53                   | 15                   | 22          |
| <b>Insulin-B2T_FF 0min</b> | 59                   | 17                   | 24          |
| <b>Insulin-B2T_KV 0min</b> | 49                   | 28                   | 33          |

**Table S1.b** calculation of secondary structure percentage from K2D software of final stage/800min.

| SAMPLES                      | % of $\alpha$ -HELIX | % of $\beta$ -STRAND | RANDOM COIL |
|------------------------------|----------------------|----------------------|-------------|
| <b>Insulin 800min</b>        | 21                   | 45                   | 45          |
| <b>Insulin-B2T_YY 800min</b> | 12                   | 30                   | 48          |
| <b>Insulin-B2T_TT 800min</b> | 62                   | 16                   | 22          |
| <b>Insulin-B2T_FF 800min</b> | 11.5                 | 32                   | 37          |
| <b>Insulin-B2T_KV 800min</b> | 6.93                 | 47                   | 45          |

**Table S1.c** calculation of secondary structure percentage from K2D software of four peptides.

| SAMPLES | % of $\alpha$ -HELIX | % of $\beta$ -STRAND | RANDOM COIL |
|---------|----------------------|----------------------|-------------|
| B2T_YY  | 6.71                 | 38.21                | 50.5        |
| B2T_TT  | 3.95                 | 50.1                 | 45.7        |
| B2T_FF  | 6.45                 | 40.32                | 52.5        |
| B2T_KV  | 11.27                | 35.21                | 44.2        |

**Table S2.a** ITC parameters of B2T\_YY and insulin.

| THERMODYNAMIC PARAMETERS      | VALUE                                  |
|-------------------------------|----------------------------------------|
| ENTHALPY CHANGE $\Delta H$    | $1.647 \cdot 10^4$ cal M <sup>-1</sup> |
| ENTROPY CHANGE $\Delta S$     | 72.1 cal/mol/deg                       |
| FREE ENERGY CHANGE $\Delta G$ | $-9.5 \cdot 10^3$ kcal M <sup>-1</sup> |
| DISSOCIATION CONSTANT $K_a$   | $4.96 \cdot 10^3$ M <sup>-1</sup>      |

Table S2.b ITC parameters of B2T\_FF and insulin.

| THERMODYNAMIC PARAMETERS      | VALUE                                   |
|-------------------------------|-----------------------------------------|
| ENTHALPY CHANGE $\Delta H$    | $-3.095 \cdot 10^4$ cal M <sup>-1</sup> |
| ENTROPY CHANGE $\Delta S$     | -93.9 cal/mol/deg                       |
| FREE ENERGY CHANGE $\Delta G$ | $11.7 \cdot 10^3$ kcal M <sup>-1</sup>  |
| DISSOCIATION CONSTANT $K_a$   | $1.42 \cdot 10^3$ M <sup>-1</sup>       |

Table S2.c ITC parameters of B2T\_TT and insulin.

| THERMODYNAMIC PARAMETERS      | VALUE                                                                                                                                                               |
|-------------------------------|---------------------------------------------------------------------------------------------------------------------------------------------------------------------|
| ENTHALPY CHANGE $\Delta H$    | $2.996 \cdot 10^3$ cal M <sup>-1</sup> , $-4.623 \cdot 10^3$ cal M <sup>-1</sup> , $2.706 \cdot 10^3$ cal M <sup>-1</sup> , $-2.190 \cdot 10^3$ cal M <sup>-1</sup> |
| ENTROPY CHANGE $\Delta S$     | 30.1 cal/mol/deg, 6.37 cal/mol/deg, 30.2 cal/mol/deg and 12.5 cal/mol/deg                                                                                           |
| FREE ENERGY CHANGE $\Delta G$ | $-24.3 \cdot 10^6$ kcal M <sup>-1</sup> , $4.7 \cdot 10^3$ kcal M <sup>-1</sup> , $5.7 \cdot 10^3$ kcal M <sup>-1</sup> , $-5.3 \cdot 10^3$ kcal M <sup>-1</sup>    |
| DISSOCIATION CONSTANT $K_a$   | $2.3 \cdot 10^4$ M <sup>-1</sup> , $6.01 \cdot 10^4$ , $4.16 \cdot 10^4$ and $2.16 \cdot 10^4$ M <sup>-1</sup>                                                      |

Table S2.d- ITC parameters of B2T\_KV and insulin.

| THERMODYNAMIC PARAMETERS      | VALUE                                 |
|-------------------------------|---------------------------------------|
| ENTHALPY CHANGE $\Delta H$    | $1.493 \cdot 10^3 \text{ cal M}^{-1}$ |
| ENTROPY CHANGE $\Delta S$     | $28.0 \text{ cal/mol/deg}$            |
| FREE ENERGY CHANGE $\Delta G$ | $-28 \cdot 10^6 \text{ kcal M}^{-1}$  |
| DISSOCIATION CONSTANT $K_a$   | $1.04 \cdot 10^{-5} \text{ M}^{-1}$   |

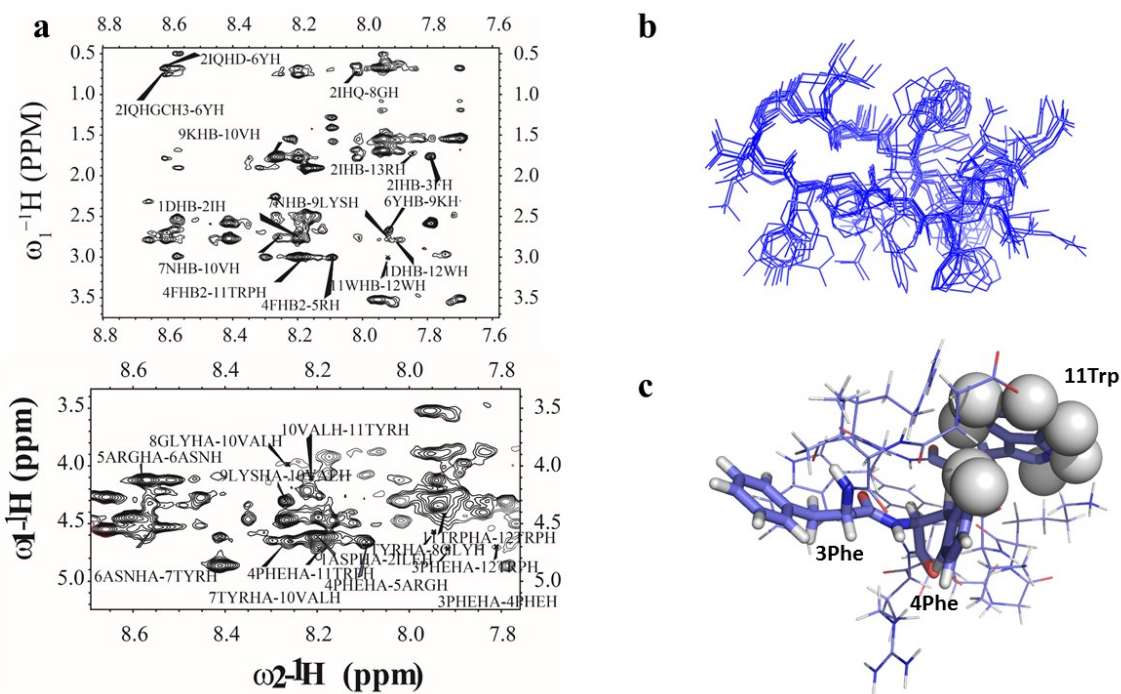

SI figure 1 a) Noesy spectrum of B2T\_FF, b) ensemble structure of B2T\_FF and c) showing the orientation of the residues during hairpin structure formation.



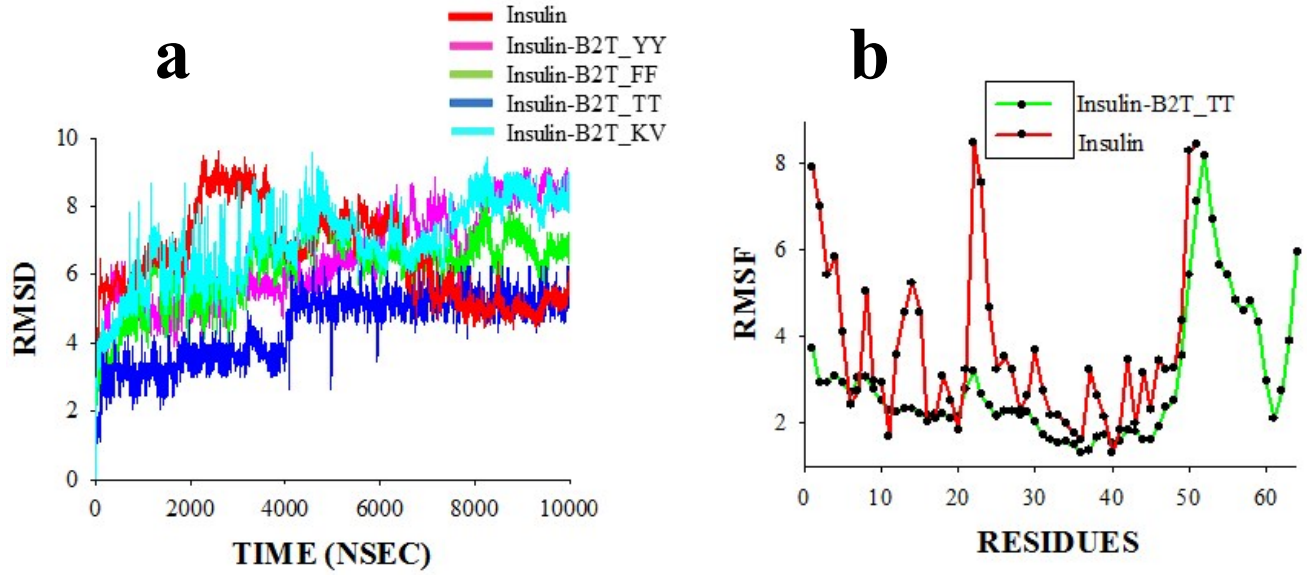

SI figure 4 a) RMSD graph calculated from 100ns of molecular simulation run of insulin, insulin-B2T complex peptides. b) RMSF graph of insulin and insulin-B2T\_TT complex.

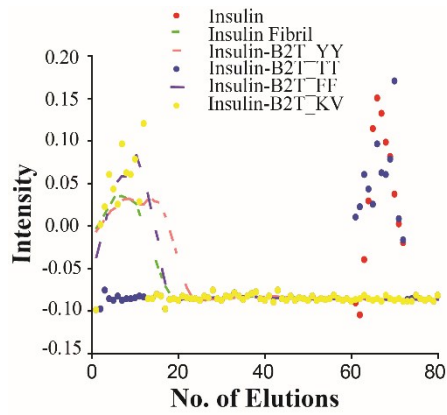

SI Figure 5 Size-exclusion chromatography of insulin pre-heating, insulin-fibrils and insulin-B2T peptides.

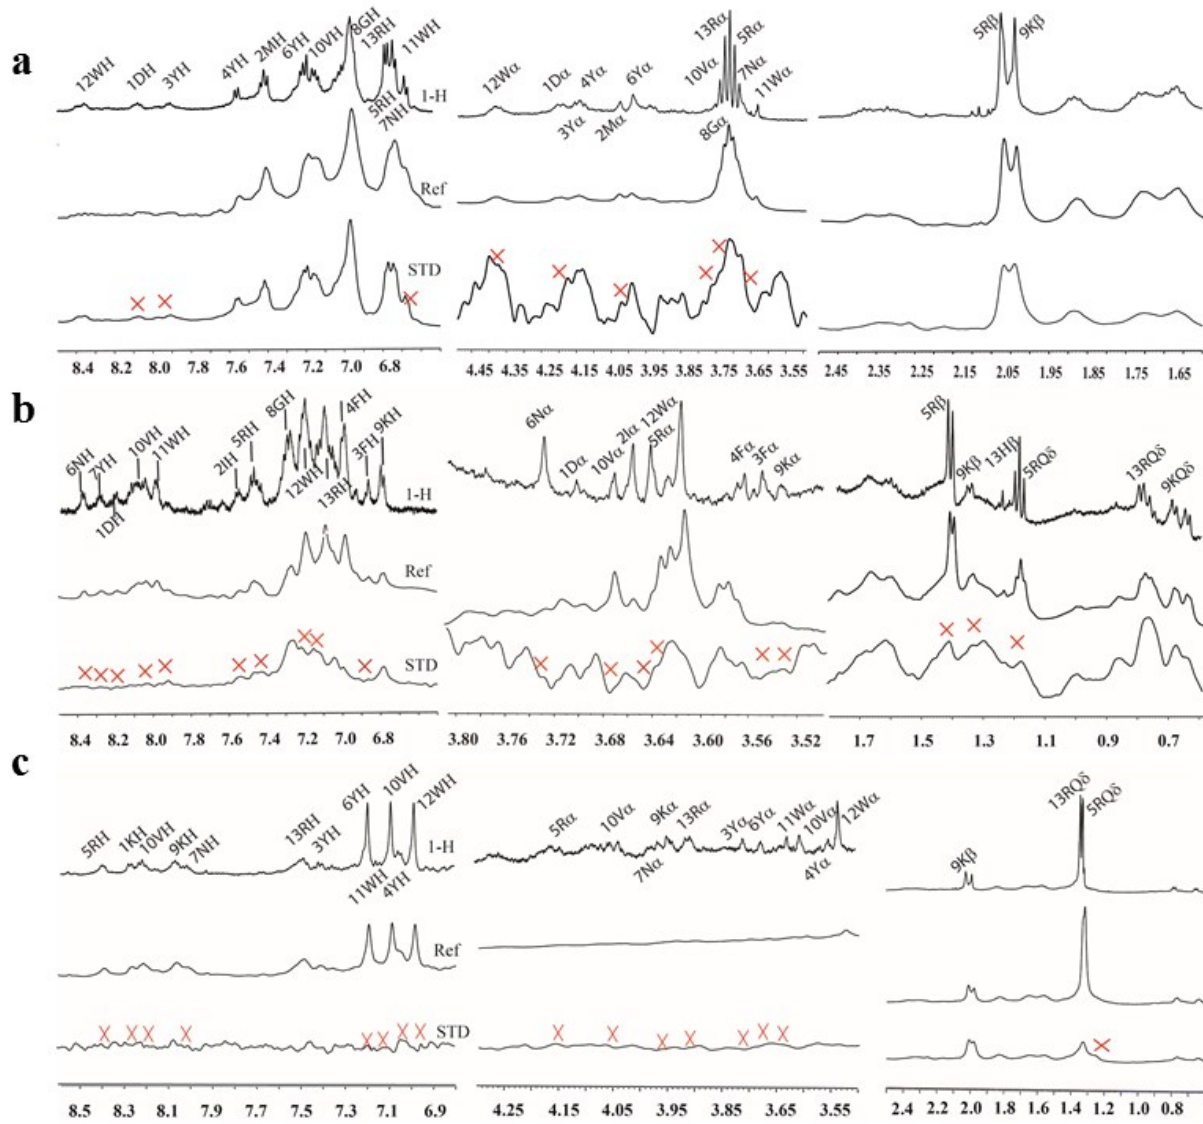

SI figure 6 a) STD NMR of B2T\_YY, b) STD NMR of B2T\_FF and c) STD NMR of B2T\_KV.
